# Supplementary material for: Systematic Analysis of Quantitative Logic Model Ensembles Predicts Drug Combination Effects on Cell Signaling Networks
Source: PubMed Central journal article supplement — CPT Pharmacometrics Syst Pharmacol. 2016 Aug 27;5(10):544–53. doi: 10.1002/psp4.12104 (PMC5080650; doi:10.1002/psp4.12104), 2016-08-27
Supplement: PSP4-5-544-s006.pdf [file PSP4-5-544-s006.pdf]

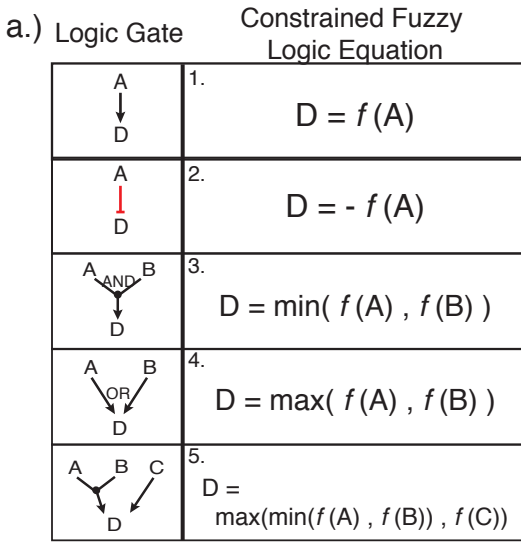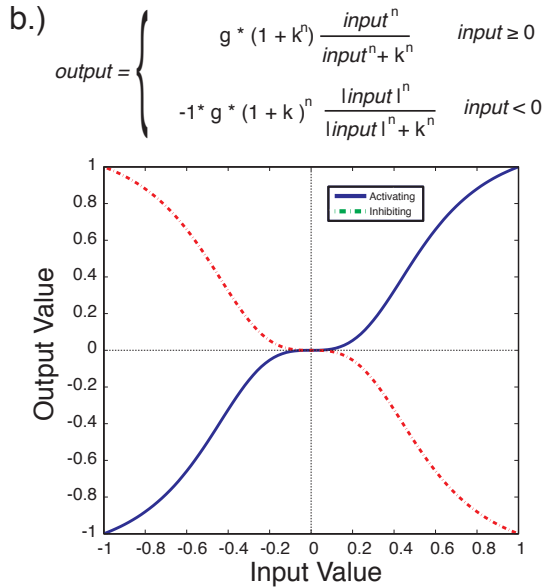

c.) Model

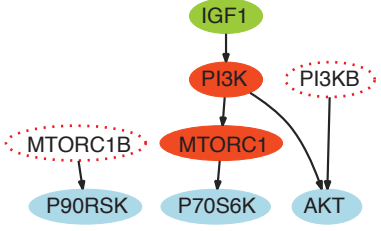

d.) Data

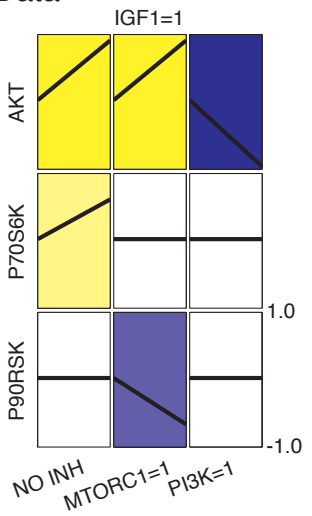

e.) Simulation Procedure

Condition: IGF1 = 1

|                          | Akt | p70s6k | p90RSK |
|--------------------------|-----|--------|--------|
| 1. Inhib Basal Effect    | 0   | 0      | 0      |
| 2. Stim Effect           | 0.9 | 0.6    | 0      |
| 3. Inhib & Stim Effect   | 0.9 | 0.6    | 0      |
| Final Value (Step 1 + 3) | 0.9 | 0.6    | 0      |

Condition: IGF1 = 1, PI3K inhibition

|                          | Akt  | p70s6k | p90RSK |
|--------------------------|------|--------|--------|
| 1. Inhib Basal Effect    | -0.7 | 0      | 0      |
| 2. Stim Effect           | 0.9  | 0.6    | 0      |
| 3. Inhib & Stim Effect   | -0.3 | 0      | 0      |
| Final Value (Step 1 + 3) | -1   | 0      | 0      |

Condition: IGF1 = 1, MTORC1 inhibition

|                          | Akt | p70s6k | p90RSK |
|--------------------------|-----|--------|--------|
| 1. Inhib Basal Effect    | 0   | 0      | -0.7   |
| 2. Stim Effect           | 0.9 | 0.6    | 0      |
| 3. Inhib & Stim Effect   | 0.9 | 0      | 0      |
| Final Value (Step 1 + 3) | 0.9 | 0      | -0.7   |
