# Supplementary material for: Systematic Analysis of Quantitative Logic Model Ensembles Predicts Drug Combination Effects on Cell Signaling Networks
Source: PubMed Central journal article supplement — CPT Pharmacometrics Syst Pharmacol. 2016 Aug 27;5(10):544–53. doi: 10.1002/psp4.12104 (PMC5080650; doi:10.1002/psp4.12104), 2016-08-27
Supplement: PSP4-5-544-s008.pdf [file PSP4-5-544-s008.pdf]

Scenario file specifying environments and perturbations

Criteria file specifying species to increase or decrease

Make Specified Combinations

Make comparison conditions based on no perturbation conditions in scenario

Scenario Projects

Comparison Projects

Simulate

All simulation results

Simulation results for comparison

Evaluate math to compare all simulation results to comparison

Evaluate criteria

Write file containing combinations that pass criteria
