# Supplementary figures and images for: Systematic Analysis of Quantitative Logic Model Ensembles Predicts Drug Combination Effects on Cell Signaling Networks
Source: PubMed Central journal article supplement — CPT Pharmacometrics Syst Pharmacol. 2016 Aug 27;5(10):544–53. doi: 10.1002/psp4.12104 (PMC5080650; doi:10.1002/psp4.12104), 2016-08-27

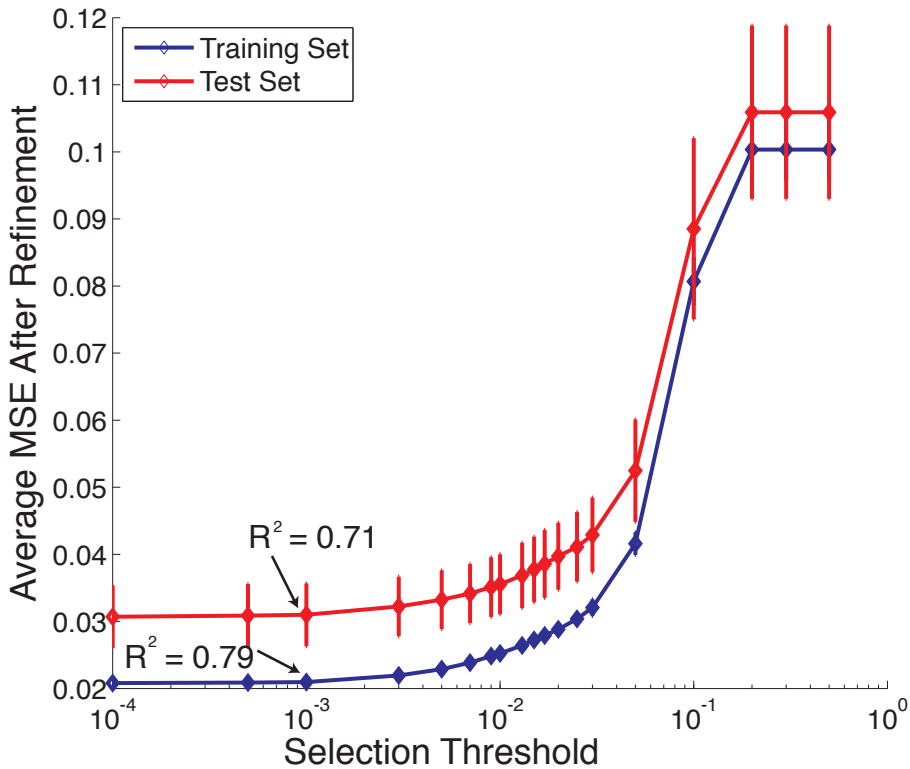

Supplement: PSP4-5-544-s007.pdf [file PSP4-5-544-s007.pdf]
